# Supplementary material for: Host Growth Can Cause Invasive Spread of Crops by Soilborne Pathogens
Source: PLoS One. 2013 May 8;8(5):e63003. doi: 10.1371/journal.pone.0063003 (PMC3648505; doi:10.1371/journal.pone.0063003)
Supplement: Appendix S3 — Trends in model outcomes. (DOC) [file pone.0063003.s003.doc]

Appendix S3: Trends in model outcomes

***Methodology***

In order to distinguish linear from non-linear trends in model outcomes, which are typical of non-invasive and invasive pathogen spread, respectively, we regressed a second order polynomial and a linear model on the number of infected hosts among replicate stochastic realisations of the population model (*Yi*) at a given sequence of times *t*:

(s3.1)

(s3.2)

Here εi is a standardised normal error, and the coefficients α1, α2, α3 and γ1, γ2 were unconstrained.

In order to focus on trends after an apparent change in epidemic behaviour due to host growth, we cut-off the data and only kept the number of infected hosts after *t>80 days, t>110 days* and *t>140 days* for *xcc=11, 14* and *17cm* respectively.

A non-linear trend is established when α3 is significantly different from zero (p-value<0.05) whereas a linear trend is recognised when α3 is not significant and when the trend is better described by model (s3.2) (i.e. smaller AIC and γ1, γ2 significantly different from zero).

***Results***

Table S3.1 Estimated parameters, p-value and Akaike information criterion (AIC) of the polynomial regression (equation (s3.1)) to the trend in the number of infections in the simulated stochastic population models for initial spacing *xcc=11, 14 and 17cm*.

|  | *α1* | *α2* | *α3* | *AIC* |
| --- | --- | --- | --- | --- |
|  |  |  |  |  |
| *Initial spacing = 11cm* |  |  |  |  |
|  |  |  |  |  |
| Static contact distance | 4.52 x 101 (p<10-15) | 4.97 x 10-2 (p<10-15) | -4.81 x 10-6**(p=0.67)** | 40567 |
| Dynamic contact distance | 4.16 x 101 (p<10-15) | 7.20 x 10-2 (p<10-15) | 3.15 x 10-4 **(p<10-15)** | 191861 |
|  |  |  |  |  |
| *Initial spacing = 14cm* |  |  |  |  |
|  |  |  |  |  |
| Static contact distance | 4.73 x 101 (p<10-15) | 6.60 x 10-3 (p=0.33) | 3.08 x 10-5 **(p=0.09)** | 9525 |
| Dynamic contact distance | 4.48 x 101 (p<10-15) | 9.92 x 10-3 (p=0.27) | 2.92 x 10-4 **(p<10-15)** | 102798 |
|  |  |  |  |  |
| *Initial spacing = 17cm* |  |  |  |  |
|  |  |  |  |  |
| Static contact distance | 4.69 x 101 (p<10-15) | 4.53 x 10-3 (p=0.79) | 1.75 x 10-6 **(p=0.97)** | 1423. |
| Dynamic contact distance | 4.58 x 101 (p<10-15) | 2.70 x 10-3 (p=0.9) | 1.29 x 10-4 **(p<0.02)** | 21236 |
|  |  |  |  |  |

Table S3.2 Estimated parameters, p-value and Akaike information criterion (AIC) of the linear regression (equation (s3.2)) to the trend in the number of infections in the simulated stochastic population models for initial spacing *xcc=11, 14 and 17cm*.

|  | *γ1* | *γ2* | *AIC* |
| --- | --- | --- | --- |
|  |  |  |  |
| *Initial spacing = 11cm* |  |  |  |
|  |  |  |  |
| Static contact distance | 4.53 x 101 (p<10-15) | 4.81 x 10-2 (p<10-15) | 40566 |
| Dynamic contact distance | 3.27 x 101 (p<10-15) | 1.83 x 10-1 (p<10-15) | 192457 |
|  |  |  |  |
| *Initial spacing = 14cm* |  |  |  |
|  |  |  |  |
| Static contact distance | 4.63 x 101 (p<10-15) | 1.80 x 10-2 (p<10-15) | 9524 |
| Dynamic contact distance | 3.46 x 101 (p<10-15) | 1.22 x 10-1 (p<10-15) | 102950 |
|  |  |  |  |
| *Initial spacing = 17cm* |  |  |  |
|  |  |  |  |
| Static contact distance | 4.70 x 101 (p<10-15) | 5.2 x 10-3 (p<10-4) | 1421 |
| Dynamic contact distance | 4.08 x 101 (p<10-15) | 5.42 x 10-2 (p<10-15) | 21240 |
|  |  |  |  |

Figure S3 Trends in population model outcomes. Number of infected hosts (grey points), (A-B-C) with a static host contact distance equal to plant spacing and (D-E-F) with dynamic host contact distance. Upper, middle and lower graphs are numbers of infected hosts for distance *xcc= 11, 14 and 17cm* and *t> 80, 110 and 140 days* respectively. Green dotted lines show the linear trends obtained from model (s3.2) whereas red lines illustrate the non-linear trends from model (s3.1). (A-B-C) were better exhibited linear trends and were better described by model (s3.2) while (D-E-F) demonstrated non-linear trends and were statistically better described by model (s3.1).
